1 Title: Prevalence of Migraine and its associated factors among medical students of Bangladesh: A cross  
2 sectional study

3 Authors:

4 Abdur Rafi<sup>1,2</sup>, Email: [abdurrafi007@gmail.com](mailto:abdurrafi007@gmail.com)

5 Tasnim Shahriar<sup>3</sup>, Email: [tshahriarkmc@gmail.com](mailto:tshahriarkmc@gmail.com)

6 Yeasin Arafat<sup>2,4</sup>, Email: [yeasin.ndc90@gmail.com](mailto:yeasin.ndc90@gmail.com)

7 Abhishek Karmaker<sup>2,5</sup>, Email: [abhishek.kjoy@gmail.com](mailto:abhishek.kjoy@gmail.com)

8 Showsan Kabir Chowdhury<sup>2,6</sup>, Email: [showsankabirmaisha@gmail.com](mailto:showsankabirmaisha@gmail.com)

9 Benazir Jahangir<sup>2,7</sup>, Email: [benazirjahangir@gmail.com](mailto:benazirjahangir@gmail.com)

10 Meherab Hossain<sup>2,8</sup>, Email: [mehrab.ndc17@gmail.com](mailto:mehrab.ndc17@gmail.com)

11 Mahamoda Sultana<sup>2,9</sup>, Email: [mahamoda40@gmail.com](mailto:mahamoda40@gmail.com)

12 Md. Golam Hossain<sup>10</sup>, Email: [hossain95@yahoo.com](mailto:hossain95@yahoo.com)

13

14 Affiliations:

15 <sup>1</sup>Rajshahi Medical College, Rajshahi, Bangladesh

16 <sup>2</sup>Research Wing, Platform Medical and Dental Society, Dhaka, Bangladesh

17 <sup>3</sup>Khulna Medical College, Khulna, Bangladesh

18 <sup>4</sup>North South University, Dhaka, Bangladesh

19 <sup>5</sup>Sir Salimullah Medical College, Dhaka, Bangladesh

20 <sup>6</sup>Magura Medical College, Magura, Bangladesh

21 <sup>7</sup>Z. H. Sikder women's medical college, Dhaka, Bangladesh

22 <sup>8</sup>Dhaka Central International Medical College, Dhaka, Bangladesh

23 <sup>9</sup>Enam medical College, Dhaka, Bangladesh

24 <sup>10</sup>Health Research Group, Department of Statistics, University of Rajshahi, Rajshahi

25

26

27

28

29 Abstract

30 Introduction: Medical students are vulnerable group to migraine, one of the most common type of  
31 headache worldwide. The aim of the present study was to determine the prevalence of migraine and  
32 related disability among medical students of Bangladesh.

33 Methods: This cross-sectional study was conducted among 1327 students from six medical colleges  
34 Bangladesh during March 2021 through a self-administered online survey. ID Migraine<sup>TM</sup> scale and  
35 MIDAS scale were used to screen migraine and migraine related disability respectively. Frequency  
36 distribution, and Chi-square test, t-test along with multiple logistic regressions model were used to  
37 determine the prevalence and associated factors of migraine respectively.

38 Results: The overall prevalence of migraine among the participants was 19%. The prevalence was higher  
39 among females (27%) than males (8%). Female sex (aOR 4.11, 95% CI 2.79-6.03) and poor sleep quality  
40 (aOR 2.07, 95% CI 1.48-2.91) were identified as independent risk factors of migraine. More than 90%  
41 migrainures reported to suffer from moderate to severe headache. Nausea was most commonly reported  
42 associated symptom (83.5%) followed by photophobia (72%) and vomiting (53%). Self-reported mental  
43 stress (55%), irregular sleep (49%), noise (30.5%), and usage of electronic device (30.5%) were most  
44 commonly reported triggering factor of migraine attack. More than half of the sufferers reported severe  
45 migraine related disability (MIDAS score  $\geq$  21).

46 Conclusions: The prevalence of migraine among medical students of Bangladesh is alarmingly high.  
47 Frequent migraine attacks and severe intensity of headache cause a substantial level of disability among  
48 the sufferers. Cautious avoidance of the triggering factors through appropriate interventions and  
49 prophylactic medication can mitigate the negative impact of migraine as well as improve the quality of  
50 life.

51

52 Keywords: Migraine, ID Migraine, MIDAS, Migraine related disability, Medical students, Bangladesh

## 53 Introduction

54 Migraine is a disabling neurological disorder characterized by localized, intense, throbbing or pulsing  
55 sensations in the head, often accompanied by nausea, vomiting, photophobia and/or phonophobia (1). It is  
56 one of the most common type of headache affecting more than 15% people worldwide (2) and considered  
57 as the eighth most burdensome disease globally (3). It is more prevalent among younger age group (4,5)  
58 resulting in hampered the quality of life and productivity a lot (6). For example, it was estimated that  
59 migraine caused a loss of 112 million days of work or school a year in US and 25 million days in UK (7).  
60 Despite these huge burden, migraine often remains underdiagnosed and untreated which makes the  
61 situation more grave (8).

62 Few evidences from South Asian countries showed variety in migraine prevalence ranging from 14 to  
63 30% in India (9,10), 38% in Pakistan (11), and 35% in Nepal (12). However, there is lack of evidence on  
64 the epidemiology and characteristics of migraine as well as its effect on the day to day life of the patients  
65 in Bangladesh. A study reported that almost 26% of all headaches in Bangladesh is due to migraine (13).

66 Migraine attacks are triggered by a wide range of factors. Psychological stress, smoking, pattern of sleep,  
67 weather change, missing a meal, bright light, certain food and alcohol consumption etc. are considered as  
68 major triggering factors (14–16). It is evidenced that young adults are more prone to these factors which  
69 makes them vulnerable to frequent migraine attacks. Especially, medical students are identified as a more  
70 vulnerable group for developing migraine worldwide compared to other non-medical students because of  
71 the physical and psychological stressors present in their academic life (17–19). Prevalence of migraine is  
72 reported as higher among medical students in different countries ranging from 26 to 52% (12,20,21)  
73 compared to the general population (14 to 16%) (3) or other faculty students (10 to 18%) (22). This high  
74 prevalence of migraine impairs the academic performance of the students and also decrease the quality of  
75 life of the sufferers (23,24). So, it is important to explore the epidemiology and characteristics of migraine  
76 headache among the medical students as well as to mitigate the triggers to uphold the quality of life of the  
77 patients.

78 Despite being a significant issue, there is very little evidence reporting the prevalence, characteristics and  
79 factors associated with migraine among the medical students of Bangladesh. A study including a small  
80 sample reported that the prevalence of migraine was around 17% among the medical students of  
81 Bangladesh (25). However the study did not revealed the characteristics of migraine and factor associated  
82 with it. Hence, the present study aimed to find out the prevalence and characteristics of migraine and its  
83 associated factors among the medical students of Bangladesh.

84

85 Methods

86 Study Design and Participants

87 The study was a cross-sectional study conducted among the students of three government medical  
88 colleges (Khulna Medical College, Khulna, Sir Salimullah Medical College, Dhaka, and Magura Medical  
89 College, Magura) and three private medical colleges (Z. H. Sikder medical college, Dhaka, Central  
90 International Medical College, Dhaka, and Enam medical College, Dhaka) of Bangladesh. Sample size  
91 was calculated from the following formula:  $n = \frac{z^2 p(1-p)}{d^2}$ , where,  $z = 1.96$  considering the 95%  
92 confidence level,  $p =$  assumed prevalence of migraine among medical students, and  $d =$  precision of error  
93 for the prevalence estimate. A previous study reported the prevalence of migraine among medical  
94 students as 17.4 % (25). Using this information the calculated sample size was 1823. Assuming 10% non-  
95 response rate we approached 2000 medical students. Convenience sampling using an online survey was  
96 used to include participants.

97 Data collection procedure

98 Data collection was done using a self-administered online survey form created in Google Forms. The  
99 questionnaire was reviewed by two independent consultant neurologists for content validity. Then it was  
100 pre-tested among 30 medical students who were not included in the final analysis. The survey was created

101 and executed in English, as the medium of study was English in the medical colleges of Bangladesh. The  
102 survey link was circulated among the students after their online lecture with a request to fill up  
103 immediately. Login with email was mandatory to avoid the repetitive input of data. But we did not collect  
104 any email address to maintain the anonymity of the study. The study was conducted following the  
105 Checklist for Reporting Results of Internet ESurveys (CHERRIES) guidelines(26). Finally, a total of  
106 1327 medical students completed the full survey.

#### 107 Data collection instrument

108 The survey questionnaire comprised of three parts: (i) socio-demographics, lifestyle and behavioral  
109 factors related data, (ii) headache-related data, and (iii) migraine related disability, if migraine was  
110 present using the Migraine Disability Assessment Score (MIDAS).

#### 111 Part 1: Socio-demographics, lifestyle and behavioral factors

112 Socio-demographic information was collected during the survey by asking questions concerning age,  
113 gender, study year, monthly family income, marital status, height, and weight. Lifestyle and behavioral  
114 factors included fast food intake (frequency per week), amount of physical exercising (days per week for  
115 at least 30 minutes a day), smoking habits (yes/no), alcohol intake (yes/no), substance abuse (yes/no), and  
116 sleep quality measured by the Pittsburgh sleep quality index (PSQI) which is an appropriate screening  
117 tool for measuring sleep dysfunction in both clinical and non-clinical samples. The PSQI score was  
118 categorized as poor (PSQI score >5) and good (PSQI score  $\leq$ 5) (27).

#### 119 Part 2: Headache related data

120 Participants were initially evaluated by the question “*Did you have two or more headaches in the last 3*  
121 *months?*” Those who responded ‘yes’ were considered as the subjects with potentially troublesome  
122 headaches and further screened using the ID Migraine™ test. The ID-Migraine™ test is a three-item self-  
123 administered screening tool, developed by Lipton et al. (2003) (28). It consists of three questions

124 regarding problems related to migraines over the last three months: 1. *Did you feel nauseated or sick in*  
125 *your stomach with your headaches?* 2. *Did light bother you when you had a headache (a lot more than*  
126 *when you do not have headaches)?* and 3. *Did your headache limit your ability to work, study or do what*  
127 *you needed to do for at least 1 day?* A test-diagnosis of migraine headache is made by at least two  
128 positive responses. ID Migraine<sup>TM</sup> has been validated using the International Classification of Headache  
129 Disorders (ICHD) criteria in different studies with a pooled sensitivity of 0.84 and a specificity of 0.76  
130 (29).

131 Headache related data were collected from the participants who were screened as positive for migraine.  
132 These included intensity of headache (measured on a four-point scale where 0 = no headache; 1 = mild  
133 headache; 2 = moderate headache; 3 = severe headache recommended for use in migraine research by the  
134 International Headache Society) (30), frequency of headache during the past month, associated symptoms  
135 of headache, characteristic of headache (unilateral, bilateral, pulsating, and throbbing), frequency of  
136 analgesic use during the past month, frequency of healthcare facility visit during past 12 months, migraine  
137 triggers, and family history of migraine.

### 138 Part 3: Migraine related disability

139 Disability due to migraine among the participants was assessed using the Migraine Disability Assessment  
140 Score (MIDAS). The MIDAS was primarily developed and validated in general population with migraine  
141 by Stewart et. al. (31). It is a simple and easily interpretable well validated disability screening tool and  
142 widely used among migrainure medical students (24,32,33). Disability is classified into four grades  
143 according to the MIDAS scale: little or no disability (scores range 0–5), mild disability (scores range 6–  
144 10), moderate disability (scores range 11–20), and severe disability (scores 21 or greater).

### 145 Statistical analysis

146 All statistical analyses were conducted using the SPSS version 24.0. Descriptive statistics like frequency  
147 with percentage were used for categorical variables and mean with SD (Standard deviation) were used for  
148 continuous variables. Chi-square test was used to test the difference between groups in case of categorical  
149 variables and independent t-test was used in case of continuous variables. Multiple logistic regression  
150 models including the significant variables of the bivariate analysis were used to find out the factors  
151 associated with migraine. A p-value of  $< 0.05$  with 95% confidence interval (CI) was considered as  
152 statistically significant.

153

## 154 Results

### 155 Socio-demographic characteristics

156 The participants of the study aged between 17 to 25 years (mean 22, SD 2 years). More than 56% of them  
157 were female and belonged to middle (43%) or high (44%) income family. Almost 27% of the participants  
158 were overweight. The daily screen time was more than six hours of 39% of the participants. Almost 9%  
159 were smoker and 6.5% were alcohol or other substance abuser (Table 1).

### 160 Prevalence of migraine

161 A total of 249 (19%) participants were screened as positive in ID Migraine<sup>TM</sup> scale. Prevalence of  
162 migraine was higher among younger (24% in 17-19 years age group) and female participants (27% in  
163 female vs 8% in male) (Table 1).

164 Chi-square test showed that lack of regular exercise (less than once a week), smoking tobacco, alcohol  
165 drinking and poor sleep quality were associated with migraine (Table 1). However, in logistic regression  
166 models, it was found that female participants had four times higher risk of having migraine (aOR 4.11,  
167 95% CI 2.79-6.03, p-value  $< 0.001$ ) while those who had poor sleep quality had two times higher risk than  
168 their counterpart's (aOR 2.07, 95% CI 1.48-2.91, p-value  $< 0.001$ ) (table 2).

169 Table 1: Sociodemographic characteristics of the participants according to migraine status (n=1327)

| Characteristics          | Total       | Migraine   | No migraine | p-value |
|--------------------------|-------------|------------|-------------|---------|
| Age                      | 22.1 (2.0)  | 21.5 (2.1) | 22.2 (2.7)  | 0.181   |
| Age (category)           |             |            |             |         |
| 17-19                    | 380 (28.6)  | 91 (23.9)  | 289 (76.1)  | 0.008   |
| 20-22                    | 704 (53.1)  | 115 (16.3) | 589 (83.7)  |         |
| 23-25                    | 243 (18.3)  | 43 (17.7)  | 200 (82.3)  |         |
| Sex                      |             |            |             |         |
| Female                   | 751 (56.6)  | 203 (27.0) | 548 (73.0)  | <0.001  |
| Male                     | 576 (43.4)  | 46 (8.0)   | 530 (92.0)  |         |
| Study year               |             |            |             |         |
| 1 <sup>st</sup>          | 299 (22.5)  | 66 (22.1)  | 233 (77.9)  | 0.019   |
| 2 <sup>nd</sup>          | 225 (17.0)  | 52 (23.1)  | 173 (76.9)  |         |
| 3 <sup>rd</sup>          | 202 (15.2)  | 41 (20.3)  | 161 (79.7)  |         |
| 4 <sup>th</sup>          | 344 (25.9)  | 47 (13.7)  | 297 (86.3)  |         |
| 5 <sup>th</sup>          | 257 (19.4)  | 43 (16.7)  | 214 (83.3)  |         |
| Family income            |             |            |             |         |
| Low                      | 180 (13.6)  | 31 (17.2)  | 149 (82.8)  | 0.353   |
| Middle                   | 567 (42.7)  | 99 (17.5)  | 468 (82.5)  |         |
| High                     | 580 (43.7)  | 119 (20.5) | 461 (79.5)  |         |
| Marital status           |             |            |             |         |
| Unmarried                | 1274 (96.0) | 237 (18.6) | 1037 (81.4) | 0.461   |
| Married                  | 53 (4.0)    | 12 (22.6)  | 41 (77.4)   |         |
| BMI (kg/m <sup>2</sup> ) |             |            |             |         |



|                                    |             |            |             |           |
|------------------------------------|-------------|------------|-------------|-----------|
| Overweight ( $\geq 25$ )           | 353 (26.6)  | 70 (19.8)  | 283 (80.2)  | 0.346     |
| Normal (18.5–24.9)                 | 841 (63.4)  | 149 (17.7) | 692 (82.3)  |           |
| Underweight ( $< 18.5$ )           | 133 (10.0)  | 30 (22.6)  | 103 (77.4)  |           |
| Exercise frequency (days per week) |             |            |             |           |
| $\geq 3$                           | 240 (18.1)  | 30 (12.5)  | 210 (87.5)  | 0.018     |
| 1-2                                | 227 (17.1)  | 42 (18.5)  | 185 (81.5)  |           |
| $< 1$                              | 860 (64.8)  | 177 (20.6) | 683 (79.4)  |           |
| Daily screen time (hours)          |             |            |             |           |
| $> 12$                             | 103 (7.8)   | 21 (20.4)  | 82 (79.6)   | 0.897     |
| 6-12                               | 410 (30.9)  | 75 (18.3)  | 335 (81.7)  |           |
| 2-6                                | 723 (54.5)  | 138 (19.1) | 585 (80.9)  |           |
| $< 2$                              | 91 (6.9)    | 15 (16.5)  | 76 (83.5)   |           |
| Smoking                            |             |            |             |           |
| Yes                                | 122 (9.2)   | 11 (9.0)   | 111 (91.0)  | 0.004     |
| No                                 | 1205 (90.8) | 238 (19.8) | 967 (80.2)  |           |
| Alcohol                            |             |            |             |           |
| Yes                                | 68 (5.1)    | 5 (7.4)    | 63 (92.6)   | 0.013     |
| No                                 | 1259 (94.9) | 244 (19.4) | 1015 (80.6) |           |
| Substance abuse                    |             |            |             |           |
| Yes                                | 19 (1.4)    | 0 (0.0)    | 19 (100.0)  | 0.134     |
| No                                 | 1308 (98.6) | 249 (19.0) | 1059 (81.0) |           |
| Sleep quality                      |             |            |             |           |
| Poor (PSQI score $> 5$ )           | 842 (63.5)  | 194 (23.0) | 648 (77.0)  | $< 0.001$ |
| Good (PSQI score $\leq 5$ )        | 485 (36.5)  | 55 (11.3)  | 430 (88.7)  |           |

170

171 Table 2: Factors associated with migraine (multiple logistic regression models)

| Characteristics                    | aOR (95% CI)     | p-value |
|------------------------------------|------------------|---------|
| Age (years)                        |                  |         |
| 17-19                              | 0.84 (0.41-1.69) | 0.628   |
| 20-22                              | 0.62 (0.36-1.05) | 0.080   |
| 23-25                              | Ref.             |         |
| Sex                                |                  |         |
| Female                             | 4.11 (2.79-6.03) | <0.001  |
| Male                               | Ref.             |         |
| Study year                         |                  |         |
| 1 <sup>st</sup>                    | 1.38 (0.68-2.81) | 0.369   |
| 2 <sup>nd</sup>                    | 1.86 (0.97-3.54) | 0.060   |
| 3 <sup>rd</sup>                    | 1.58 (0.85-2.95) | 0.148   |
| 4 <sup>th</sup>                    | 0.92 (0.53-1.60) | 0.786   |
| 5 <sup>th</sup>                    | Ref.             |         |
| Exercise frequency (days per week) |                  |         |
| ≥3                                 | 0.76 (0.49-1.18) | 0.227   |
| 1-2                                | 1.31 (0.87-1.96) | 0.188   |
| <1                                 | Ref.             |         |
| Smoking                            |                  |         |
| Yes                                | 1.31 (0.61-2.76) | 0.481   |
| No                                 | Ref.             |         |
| Alcohol intake                     |                  |         |

|                      |                  |        |
|----------------------|------------------|--------|
| Yes                  | 0.46 (0.17-1.27) | 0.138  |
| No                   | Ref.             |        |
| Sleep quality        |                  |        |
| Poor (PSQI score >5) | 2.07 (1.48-2.91) | <0.001 |
| Good (PSQI score ≤5) | Ref.             |        |

172

173 Characteristics of migraine

174 Among 249 participants with migraine more than 90% reported to suffer from moderate to severe  
 175 headache (42 and 48% respectively). Almost 56% of them had more than 10 attacks during the past  
 176 month. Nausea was most commonly reported associated symptom (83.5%) followed by photophobia  
 177 (72%) and vomiting (53%). More than 75% migraineurs had unilateral headache while more than 83%  
 178 had pulsating type of headache (Table 2). Self-reported mental stress was most commonly reported  
 179 triggering factor of migraine attack (55%) followed by irregular sleep (49%), noise (30.5%), usage of  
 180 electronic device (30.5%) and physical activities (23%) (Figure 1).

181 Table 3: Characteristics of migraine of ID migraine headache positive participants (n=249)

| Characteristics                         | N   | %    |
|-----------------------------------------|-----|------|
| Intensity of headache                   |     |      |
| Mild                                    | 24  | 9.6  |
| Moderate                                | 104 | 41.8 |
| Severe                                  | 121 | 48.6 |
| Frequency of headache during past month |     |      |
| 0-5                                     | 9   | 3.6  |
| 6-10                                    | 101 | 40.6 |

|                                                              |     |      |
|--------------------------------------------------------------|-----|------|
| 11-15                                                        | 92  | 36.9 |
| >15                                                          | 47  | 18.9 |
| Associated symptoms                                          |     |      |
| Nausea                                                       | 208 | 83.5 |
| Vomiting                                                     | 132 | 53.0 |
| Photophobia                                                  | 179 | 71.8 |
| Characteristic of headache                                   |     |      |
| Unilateral                                                   | 188 | 75.5 |
| Bilateral                                                    | 61  | 24.5 |
| Pulsating                                                    | 210 | 84.3 |
| Throbbing                                                    | 39  | 15.6 |
| Frequency of analgesic use during past month                 |     |      |
| 0-5                                                          | 9   | 3.6  |
| 6-10                                                         | 101 | 40.6 |
| 11-15                                                        | 92  | 36.9 |
| >15                                                          | 47  | 18.9 |
| Frequency of healthcare facility visit during past 12 months |     |      |
| Never                                                        | 146 | 58.6 |
| Once                                                         | 46  | 18.5 |
| Twice                                                        | 32  | 12.9 |
| 3 times                                                      | 13  | 5.2  |
| >3 times                                                     | 12  | 4.8  |

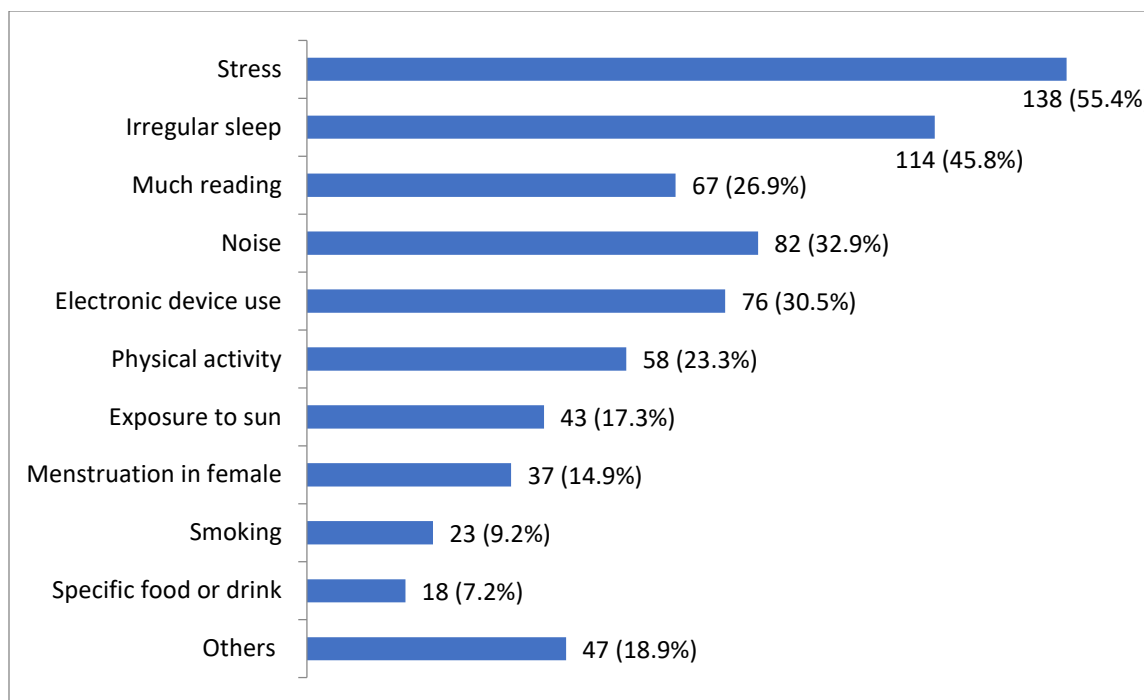

183

184 Figure 1: Triggers of migraine attacks reported by the ID Migraine positive participants (n=249)

185 Migraine related disability

186 Only 11.6% of the participants with migraine reported little or no migraine related disability as measured  
187 by MIDAS scale (score  $\leq 5$ ). Almost 20% and 16% of them reported to have mild and moderate migraine  
188 related disability while more than 52% reported severe disability (MIDAS score  $\geq 21$ ) (Figure 2).

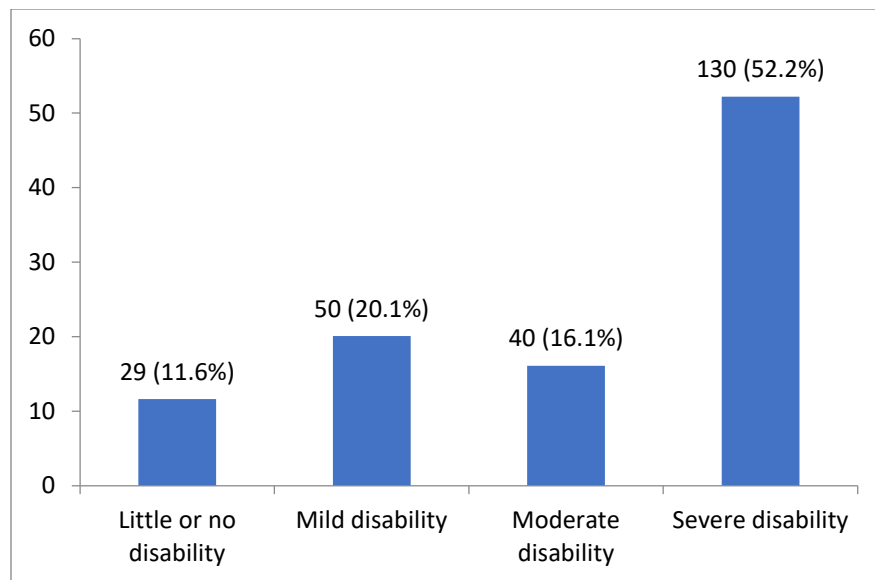

189

190 Figure 2: Migraine related disability reported by the ID Migraine positive participants (n=249)

191

## 192 Discussion

193 Epidemiological studies can play important role in finding the prevalence of a disease or/and event and as  
194 well as to inform the policy makers to make the best decision for using resources in appropriate space  
195 which is important in countries with limited resources in health sector like Bangladesh. The main  
196 objective of our study was to find out the prevalence and characteristics of migraine and its associated  
197 factors among the medical students of Bangladesh. To our best knowledge, there was very few evidence  
198 on the topic in Bangladesh. In our study, the prevalence of migraine among medical students was 19%  
199 which was within the worldwide reported range among medical students. A study conducted in  
200 neighboring India reported somewhat similar statistics (prevalence of migraine among medical students  
201 14%) (9). However some other studies reported a comparatively higher prevalence of migraine among  
202 this population group of South East Asian region such as 30% in India (10), 38% in Pakistan (11), and  
203 35% in Nepal (12). In the studies conducted in different countries like Brazil (12%) (34), Nigeria (14%)  
204 (35), Turkey (13%) (36), and Oman (12%) reported slightly lower prevalence of migraine compared to

205 our study. On the contrary, Saudi Arabia (24%) (37), Nairobi (34%) (38), or Kuwait (28%) (23) reported  
206 a higher prevalence of migraine. And this worldwide variation of migraine prevalence among medical  
207 students could be explained as there are different stressors and triggering factors in different universities  
208 and in different areas. Different diagnosis criteria, geographical location, socioeconomic and nutritional  
209 status, personal habits and physical activities could also be a contributing factor in variation of migraine  
210 prevalence.

211 Female students in the present study showed significantly higher prevalence of migraine compared to  
212 their male counterparts. Several studies also supported our finding of the higher prevalence of migraine  
213 among female participants (39–41). This phenomenon may due to hormonal influence particularly  
214 estrogen. Estrogen increases the  $\text{Ca}^{2+}$  levels and decreases  $\text{Mg}^{2+}$  level, causing an imbalance that may  
215 enhance neuronal excitation and induce migraine. It also enhances the synthesis and release of calcitonin  
216 gene-related peptide CGRP and nitric oxide, which may trigger migraine by reinforcing vasodilation with  
217 activating and transmitting pain signals to the trigeminal nerve (42).

218 We have found that students from first three years of their academic life had more prevalence which is  
219 also supported by a study in China (43) though a study from Saudi Arabia showed the opposite result  
220 where students from fifth year suffered most from the migraine (37). One of the plausible explanations to  
221 this difference could be the first year and newer students in our study participants face more difficulties to  
222 cope up with the newer environment and curriculum of medical study after completing their high school  
223 degree. Literature suggests that sedentary lifestyle, smoking tobacco, alcohol and substance abuse and  
224 sleep disturbance were associated with migraine (44–46). Though we found poor sleep quality as a risk  
225 factor of migraine, the others were not significantly associated in our study.

226 In our study mental stress was most common reported triggering factor of migraine attack. It was  
227 predictable as medical students are exposed to stress regarding their exams, high-level performance, long  
228 duration of education, and the constant responsibility to the course (28). And irregular sleep, noise, usage  
229 of electronic device, physical activities are respectively the common triggering factor next to mental

230 stress. Some previous studies also suggested similar triggering factors for migraine attack. For example,  
231 in a study among medical students of China stress at study or work and lack of sleep were most common  
232 triggering factors for migraine (43). Similar results were also found in studies from India (10), Saudi  
233 Arabia (37) and Pakistan (11).

234 Most of the participants diagnosed with migraine reported to suffer from moderate to severe headache.  
235 Among them more than half of the participants had more than ten attacks during the past month. In  
236 Turkey, the average of migraine episode was 5.9 per month (36) and in Saudi Arabia it was 4.6 per month  
237 (20). This immense rate of attack and intensity of headache among migraineurs caused severe migraine  
238 related disability. Among our participants, more than half reported severe disability. This rate of disability  
239 was unusually higher than previously reported studies. In Saudi Arabia (47) and Turkey (36) severe  
240 disability was consequently 29% and 22%. This rate of disability reduces the productivity of students  
241 which can be as much as half of the overall productivity (34). To reduce this severe level of disability  
242 controlling the trigger factors along with medicine take upon counselling with physician is needed.

#### 243 Limitations

244 There are several limitations that are needed to be considered to interpret the findings of our study.  
245 Firstly, diagnosis of migraine wasn't done clinically rather we used a self-administered screening tool  
246 which could affect the overall result of migraine prevalence. Moreover, recall bias of the participants is  
247 also a considerable limitation. Moreover, being an online survey we could not roll out the risk of  
248 sampling bias. However, more extensive and clinical diagnosis based studies are needed in order to  
249 understand prevalence and characteristics of migraine more precisely.

250

#### 251 Conclusion

252 Our study found that prevalence of migraine among medical students of Bangladesh was high. Female  
253 and junior class students are more frequently affected by migraine. It could potentially reduce their



254 academic performance and impact negatively on their productivity. Triggering factors like mental stress,  
255 smoking tobacco, alcohol drinking, etc. are needed to be mitigated in order to reduce the risk of repeated  
256 migraine attacks. Early screening and management can reduce the burden of migraine.

257

## 258 **Ethical consideration**

259 The present study was carried out in accordance with the ethical standard of the World Medical  
260 Association (i.e., declaration of Helsinki) as well as the guidelines of Institutional research ethics. The  
261 formal ethical approval was endorsed by the Ethical Review Committee of Rajshahi Medical College  
262 (RMC/ERC/2020-2022/198/178). Participants were well informed about the procedure and purpose of the  
263 study, and confidentiality of their information. Electronic informed consent was ensured by each of  
264 participants.

265 **Consent for publication:** Not applicable.

266 **Availability of data and materials:** Data will be available on request to the corresponding author.

267 **Competing interest:** The authors declare that they have no competing interest.

268 **Funding:** The authors have no support or funding to report.

## 269 **Author Contributions:**

270 Conceptualization: Abdur Rafi, Md. Golam Hossain.

271 Formal analysis: Abdur Rafi, Md. Golam Hossain.

272 Investigation: Abdur Rafi, Tasnim Shahriar, Yeasin Arafat, Abhishek Karmaker, Showsan Kabir  
273 Chowdhury, Benazir Jahangir, Meherab Hossain, Mahamoda Sultana.

274 Methodology: Abdur Rafi, Tasnim Shahriar, Md. Golam Hossain.

275 Resources: Showsan Kabir Chowdhury, Benazir Jahangir.

276 Supervision: Md. Golam Hossain

277 Writing – original draft: Abdur Rafi, Tasnim Shahriar.

278 Writing – review and editing: Abdur Rafi, Tasnim Shahriar, Yeasin Arafat, Abhishek Karmaker, Showsan

279 Kabir Chowdhury, Benazir Jahangir, Meherab Hossain, Mahamoda Sultana, Md. Golam Hossain.

## 280 **Acknowledgments**

281 We would like to express their profound gratitude to Dr. Azizul Haque, associate professor of Rajshahi  
282 Medical College and Dr. Idris Ali, consultant of Neuromedicine department of Rajshahi Medical College  
283 Hospital for their important role in reviewing the survey instruments. We are also thankful to Farhan  
284 Jadid, Mastura Jannat Mridula and Sajib Kumar Ghosh for their voluntary contributions during the survey  
285 periods.

286

## 287 **References**

- 288 1. Olesen J, Bes A, Kunkel R, Lance JW, Nappi G, Pfaffenrath V, et al. The International  
289 Classification of Headache Disorders, 3rd edition (beta version). Cephalalgia [Internet]. 2013 Jul 1  
290 [cited 2020 Sep 16];33(9):629–808. Available from: <https://pubmed.ncbi.nlm.nih.gov/23771276/>
- 291 2. Vos T, Flaxman AD, Naghavi M, Lozano R, Michaud C, Ezzati M, et al. Years lived with  
292 disability (YLDs) for 1160 sequelae of 289 diseases and injuries 1990-2010: A systematic analysis  
293 for the Global Burden of Disease Study 2010. Lancet. 2012;380(9859):2163–96.
- 294 3. Leonardi M, Raggi A. Burden of migraine: International perspectives. Neurol Sci. 2013 May  
295 22;34(SUPPL. 1):117–8.
- 296 4. Woldeamanuel YW, Andreou AP, Cowan RP. Prevalence of migraine headache and its weight on  
297 neurological burden in Africa: A 43-year systematic review and meta-analysis of community-

- 298 based studies. Vol. 342, Journal of the Neurological Sciences. Elsevier; 2014. p. 1–15.
- 299 5. Hazard E, Munakata J, Bigal ME, Rupnow MFT, Lipton RB. The burden of migraine in the  
300 United States: Current and emerging perspectives on disease management and economic analysis.  
301 Value Heal. 2009;12(1):55–64.
- 302 6. Lipton RB, Stewart WF, Scher AI. Epidemiology and economic impact of migraine. Vol. 17 Suppl  
303 1, Current medical research and opinion. Curr Med Res Opin; 2001.
- 304 7. TJ S, AI S, WF S, K K, J L, RB L. The prevalence and disability burden of adult migraine in  
305 England and their relationships to age, gender and ethnicity. Cephalalgia. 2003 Sep;23(7):519–27.
- 306 8. Woldeamanuel YW, Cowan RP. Migraine affects 1 in 10 people worldwide featuring recent rise:  
307 A systematic review and meta-analysis of community-based studies involving 6 million  
308 participants. J Neurol Sci. 2017;372:307–15.
- 309 9. Ray, Paul N, Hazra A, Das S, Ghosal MK, Misra AK, et al. Prevalence, burden, and risk factors of  
310 migraine: A community-based study from Eastern India. Neurol India. 2017 Nov;65(6):1280.
- 311 10. Raju S, S G. Prevalence of migraine among medical students of a tertiary care teaching medical  
312 college and hospital in South India - A cross-sectional study. Natl J Physiol Pharm Pharmacol.  
313 2018;8(9):1377.
- 314 11. khan A, khattak hammad, jamali R, rashid hina, riaz ayesha, ibrahimzai arsalan khan.  
315 PREVALENCE OF MIGRAINE, ITS COMMON TRIGGERING FACTORS AND COPING  
316 STRATEGIES IN MEDICAL STUDENTS OF PESHAWAR. KHYBER Med Univ J. 2012  
317 Dec;4(4):187–92.
- 318 12. Manandhar K, Risal A, Steiner TJ, Holen A, Linde M. The prevalence of primary headache  
319 disorders in Nepal: a nationwide population-based study. J Headache Pain 2015 161. 2015  
320 Nov;16(1):1–10.

- 321 13. Hussain AM, Mohit M, Ahad M, Alim M. A Study on Psychiatric Co-morbidity Among the  
322 Patients with Migraine. TAJ J Teach Assoc. 1970 Jan;21(2):108–11.
- 323 14. López-Mesonero L, Márquez S, Parra P, Gámez-Leyva G, Muñoz P, Pascual J. Smoking as a  
324 precipitating factor for migraine: A survey in medical students. J Headache Pain. 2009;10(2):101–  
325 3.
- 326 15. Nazari F, Safavi M, Mahmudi M. Migraine and its relation with lifestyle in women. Pain Pract.  
327 2010 May;10(3):228–34.
- 328 16. Takeshima T, Ishizaki K, Fukuhara Y, Ijiri T, Kusumi M, Wakutani Y, et al. Population-Based  
329 Door-to-Door Survey of Migraine in Japan: The Daisen Study. Headache. 2004 Jan;44(1):8–19.
- 330 17. Dyrbye LN, Thomas MR, Shanafelt TD. Systematic review of depression, anxiety, and other  
331 indicators of psychological distress among U.S. and Canadian medical students. Vol. 81,  
332 Academic Medicine. Lippincott Williams and Wilkins; 2006. p. 354–73.
- 333 18. Bigal ME, Bigal JM, Betti M, Bordini CA, Speciali JG. Evaluation of the impact of migraine and  
334 episodic tension-type headache on the quality of life and performance of a university student  
335 population. Headache. 2001;41(7):710–9.
- 336 19. Smitherman TA, McDermott MJ, Buchanan EM. Negative impact of episodic migraine on a  
337 university population: Quality of life, functional impairment, and comorbid psychiatric symptoms.  
338 Headache. 2011 Apr;51(4):581–9.
- 339 20. Ibrahim NK, Alotaibi AK, Alhazmi AM, Alshehri RZ, Saimaldaher RN, Murad MA. Prevalence,  
340 predictors and triggers of migraine headache among medical students and interns in King  
341 Abdulaziz University, Jeddah, Saudi Arabia. Pakistan J Med Sci. 2017 Mar;33(2):270–5.
- 342 21. Anwar F, Bilal Sheikh A, Taher T, Iqbal Khan M, Masoom A, Khursheed A, et al. Prevalence and  
343 predictors of migraine among medical students in Karachi. J Basic Res Med Sci. 2021;8(1):19–27.

- 344 22. Wang X, Zhou HB, Sun JM, Xing YH, Zhu YL, Zhao YS. The prevalence of migraine in  
345 university students: A systematic review and meta-analysis [Internet]. Vol. 23, European Journal  
346 of Neurology. Blackwell Publishing Ltd; 2016 [cited 2020 Sep 16]. p. 464–75. Available from:  
347 <https://onlinelibrary.wiley.com/doi/abs/10.1111/ene.12784>
- 348 23. Al-Hashel JY, Ahmed SF, Alroughani R, Goadsby PJ. Migraine among medical students in  
349 Kuwait University. *J Headache Pain*. 2014 Dec 1;15(1):1–6.
- 350 24. Menon B, Kinnera N. Prevalence and characteristics of migraine in medical students and its  
351 impact on their daily activities. *Ann Indian Acad Neurol* [Internet]. 2013 Apr [cited 2020 Sep  
352 21];16(2):221–5. Available from: <https://pubmed.ncbi.nlm.nih.gov/23956569/>
- 353 25. Perveen I, Parvin R, Saha M, Bari MS, Huda MN, Ghosh MK. Prevalence of Irritable Bowel  
354 Syndrome (IBS), Migraine and Co-Existing IBS-Migraine in Medical Students. *J Clin*  
355 *DIAGNOSTIC Res*. 2016;10(11):OC09.
- 356 26. Eysenbach G. Improving the quality of web surveys: The Checklist for Reporting Results of  
357 Internet E-Surveys (CHERRIES) [Internet]. Vol. 6, *Journal of Medical Internet Research*. *Journal*  
358 *of Medical Internet Research*; 2004 [cited 2020 Jul 19]. Available from:  
359 [/pmc/articles/PMC1550605/?report=abstract](https://pubmed.ncbi.nlm.nih.gov/1550605/)
- 360 27. Mollayeva T, Thurairajah P, Burton K, Mollayeva S, Shapiro CM, Colantonio A. The Pittsburgh  
361 sleep quality index as a screening tool for sleep dysfunction in clinical and non-clinical samples: A  
362 systematic review and meta-analysis. Vol. 25, *Sleep Medicine Reviews*. W.B. Saunders Ltd; 2016.  
363 p. 52–73.
- 364 28. Lipton RB, Dodick D, Sadovsky R, Kolodner K, Endicott J, Hettiarachchi J, et al. A self-  
365 administered screener for migraine in primary care: The ID migraine™ validation study.  
366 *Neurology* [Internet]. 2003 Aug 12 [cited 2020 Jun 25];61(3):375–82. Available from:  
367 <https://n.neurology.org/content/61/3/375>

- 368 29. Cousins G, Hijazze S, Van De Laar FA, Fahey T. Diagnostic accuracy of the ID migraine: A  
369 systematic review and meta-analysis. Vol. 51, Headache. 2011. p. 1140–8.
- 370 30. Tfelt-Hansen P, Pascual J, Ramadan N, Dahlöf C, D'Amico D, Diener H-C, et al. Guidelines for  
371 controlled trials of drugs in migraine: third edition. A guide for investigators. Cephalalgia. 2012  
372 Jan;32(1):6–38.
- 373 31. Stewart WF, Lipton R, Kolodner K, Liberman J, Sawyer J. Reliability of the migraine disability  
374 assessment score in a population- based sample of headache sufferers. Cephalalgia [Internet]. 1999  
375 [cited 2021 Jun 25];19(2):107–14. Available from: <https://pubmed.ncbi.nlm.nih.gov/10214536/>
- 376 32. Oraby MI, Soliman RH, Mahmoud MA, Elfar E, Abd ElMonem NA. Migraine prevalence, clinical  
377 characteristics, and health care-seeking practice in a sample of medical students in Egypt. Egypt J  
378 Neurol Psychiatry Neurosurg [Internet]. 2021 Dec 1 [cited 2021 Jun 25];57(1):1–9. Available  
379 from: <https://doi.org/10.1186/s41983-021-00282-8>
- 380 33. de Almeida CMO, Lima PAM da S, Stabenow R, Mota RS de S, Boechat AL, Takatani M.  
381 Headache-related disability among medical students in Amazon: A cross-sectional study. Arq  
382 Neuropsiquiatr. 2015 Dec 1;73(12):1009–13.
- 383 34. Ferri-de-Barros JE, de Alencar MJ, Berchielli LF, Castelhana Junior LC. Headache among  
384 medical and psychology students. Arq Neuropsiquiatr. 2011;69(3):502–8.
- 385 35. Ojini F, Okubadejo N, Danesi M. Prevalence and clinical characteristics of headache in medical  
386 students of the University of Lagos, Nigeria. Cephalalgia. 2009 Apr;29(4):472–7.
- 387 36. Balaban H, Semiz M, Senturk IA, Kavakci O, Cinar Z, Dikici A, et al. Migraine prevalence,  
388 alexithymia, and post-traumatic stress disorder among medical students in turkey. J Headache  
389 Pain. 2012 Aug;13(6):459–67.
- 390 37. Alwahbi MK, Alamri MM, Alammam AM, Alanazi AM, Alotaibi AG, Alharbi SK, et al.

- 391 Prevalence of Migraine among Medical Students of King Saud Bin Abdulaziz University for  
392 Health Sciences. *Int J Sci Res.* 2017;6(2):894–8.
- 393 38. Amayo EO, Jowi JO, Njeru EK. Headache associated disability in medical students at the  
394 Kenyatta National Hospital, Nairobi. *East Afr Med J.* 2002 Oct;79(10):519–23.
- 395 39. Seifert T, Sufrinko A, Cowan R, Scott Black W, Watson D, Edwards B, et al. Comprehensive  
396 Headache Experience in Collegiate Student-Athletes: An Initial Report From the NCAA Headache  
397 Task Force. *Headache* [Internet]. 2017 Jun 1 [cited 2020 Sep 21];57(6):877–86. Available from:  
398 <https://pubmed.ncbi.nlm.nih.gov/28480575/>
- 399 40. Birru EM, Abay Z, Abdelwuhab M, Basazn A, Sirak B, Teni FS. Management of headache and  
400 associated factors among undergraduate medicine and health science students of University of  
401 Gondar, North West Ethiopia. *J Headache Pain.* 2016 Dec 1;17(1).
- 402 41. Lebedeva ER, Kobzeva NR, Gilev D V., Olesen J. Factors Associated with Primary Headache  
403 According to Diagnosis, Sex, and Social Group. *Headache.* 2016 Feb;56(2):341–56.
- 404 42. Gupta S, Mehrotra S, Villalón CM, Perusquía M, Saxena PR, MaassenVanDenBrink A. Potential  
405 role of female sex hormones in the pathophysiology of migraine. *Pharmacol Ther.* 2007  
406 Feb;113(2):321–40.
- 407 43. Gu X, Xie Y. Migraine attacks among medical students in Soochow University, Southeast China:  
408 a cross-sectional study. *J Pain Res.* 2018 Apr;11:771–81.
- 409 44. Panconesi A. Alcohol and migraine: Trigger factor, consumption, mechanisms. A review  
410 [Internet]. Vol. 9, *Journal of Headache and Pain.* BioMed Central; 2008 [cited 2020 Sep 22]. p.  
411 19–27. Available from:  
412 <https://thejournalofheadacheandpain.biomedcentral.com/articles/10.1007/s10194-008-0006-1>
- 413 45. Rozen TD. A history of cigarette smoking is associated with the development of cranial autonomic

- 414 symptoms with migraine headaches. *Headache*. 2011 Jan;51(1):85–91.
- 415 46. Aamodt AH, Stovner LJ, Hagen K, Bråthen G, Zwart J. Headache prevalence related to smoking  
416 and alcohol use. The Head-HUNT Study. *Eur J Neurol* [Internet]. 2006 Nov 1 [cited 2020 Sep  
417 22];13(11):1233–8. Available from: <http://doi.wiley.com/10.1111/j.1468-1331.2006.01492.x>
- 418 47. Ibrahim NK, Alqarni AK, Bajaba RM, Aljuhani FM, Bally AM, Wakid MH. Migraine among  
419 Students from the Faculty of Applied Medical Sciences, King Abdulaziz University, Jeddah, Saudi  
420 Arabia. *J Adv Med Med Res*. 2018 Nov;27(11):1–10.
- 421
